# Supplementary material for: Separation, recovery and recycling of a fluorous-tagged nickel catalyst using fluorous solid-phase extractionElectronic supplementary information (ESI) available: experimental details. See http://www.rsc.org/suppdata/cc/b3/b308543k/
Source: Royal Society of Chemistry journal article supplement (doi:10.1039/b308543k), 2003-01-01
Supplement: b308543k.doc [file b308543k.doc]

# Separation, recovery and recycling of a fluorous-tagged nickel catalyst using fluorous solid-phase extraction

Ben Croxtall, Eric G. Hope and Alison M. Stuart*

Department of Chemistry, University of Leicester, Leicester, LE1 7RH, UK. Email: [amc17@le.ac.uk](mailto:amc17@le.ac.uk)

**Electronic Supplementary Information:**

Dichloromethane, dried by refluxing over CaH2, was distilled under nitrogen, stored in a closed ampoule over molecular sieves and freezed/pumped/ thawed three times to remove all dissolved gases before use. The nickel catalysts14 and the fluorous reverse phase silica gel18 were prepared by the literature procedures.

A typical procedure is given for the nickel catalysed enaminodione reaction:17

The reaction flask was charged with the nickel -diketonate catalyst (0.1 mmol), 2,4-pentanedione (1 g, 10 mmol), ethyl cyanoformate (1.48 g, 15 mmol) and dry dichloromethane (2 cm3). The reaction mixture was then stirred for 24 hours under nitrogen at room temperature.

*Workup procedure for [Ni{F13C6C(O)CHC(O)C6F13}2]:*

The crude reaction mixture was loaded onto a small column of fluorous reverse phase silica gel (diameter = 0.7 cm, length = 7 cm) and eluted with dichloromethane (20 cm3) to isolate the enaminodione product. The column was then washed with diethyl ether (15 cm3) to remove the fluorous-tagged catalyst. After removing the diethyl ether an amorphous residue was obtained and dried *in vacuo*. The catalyst was dissolved in methanol (2.5 cm3) which was subsequently removed and the catalyst was dried before repeating this procedure twice more to give a fine powder. Finally, the catalyst was washed with hexane (2.5 cm3) and dried *in vacuo* over silica gel to regenerate the active catalyst. The recycling data is presented in the Table below.

*Workup procedure for other catalysts:*

After removing the solvent *in vacuo*, ethyl ethanoate (4 cm3) was added to the residue and the suspension was filtered through celite to yield a clear filtrate. The solvent was finally removed *in vacuo* to give the cream, solid, enaminodione product.

*Product* ***2a*** *(R = R’ = CH3)*

H (CDCl3, 250 MHz) 1.3 (3H, t, 3*J*HH 7.0, OCH2C*H3*), 2.2 (3H, s, COC*H3*), 2.4 (3H, s, COC*H3*), 4.35 (2H, q, 3*J*HH 7.0, OC*H2*), 6.1 (1H, br s, N*H*), 10.0 (1H, br s, N*H*); *m/z* (ES) 199 [M+].

*Product* ***2b*** *(R = CH3, R’ = Ph)*

H (CDCl3, 250 MHz) 1.1 (3H, t, 3*J*HH 7.1, OCH2C*H3*), 2.25 (3H, s, COC*H3*), 4.2 (2H, q, 3*J*HH 7.1, OC*H2*), 6.5 (1H, br s, N*H*), 7.6 – 8.2 (5H, um, Ar*H*), 10.0 (1H, br s, N*H*); *m/z* (ES) 261 [M+].

*Product* ***2c*** *(R = R’ = Ph)*

H (CDCl3, 250 MHz) 1.1 (3H, t, 3*J*HH 6.0, C*H3*), 4.2 (2H, q, 3*J*HH 6.0, C*H2*), 7.2 – 8.1 (10H, um, Ar*H*), 8.3 (2H, br s, N*H2*); *m/z* (ES) 325 [MH+], 324 [M+].

| **Run No.** | **Mass of catalyst recovered (mg)** | **Yield of 2a (%)** |
| --- | --- | --- |
| 1 | 152 | 91 |
| 2 | 150 | 84 |
| 3 | 149 | 82 |
| 4 | 146 | 67 |
| 5 | 137 | 52 |

Table. Recycling data for [Ni{F13C6C(O)CHC(O)C6F13}2] in the synthesis of **2a**.

**References**

18 S. Kainz, Z. Luo, D. P. Curran and W. Leitner, *Synthesis*, 1998, 1425.
